# Supplementary material for: RNA folding and functions of RNA helicases in ribosome biogenesis
Source: PubMed Central journal article supplement (PMC9196750; doi:10.1080/15476286.2022.2079890), 2022-06-09

# Supplementary Figure S1

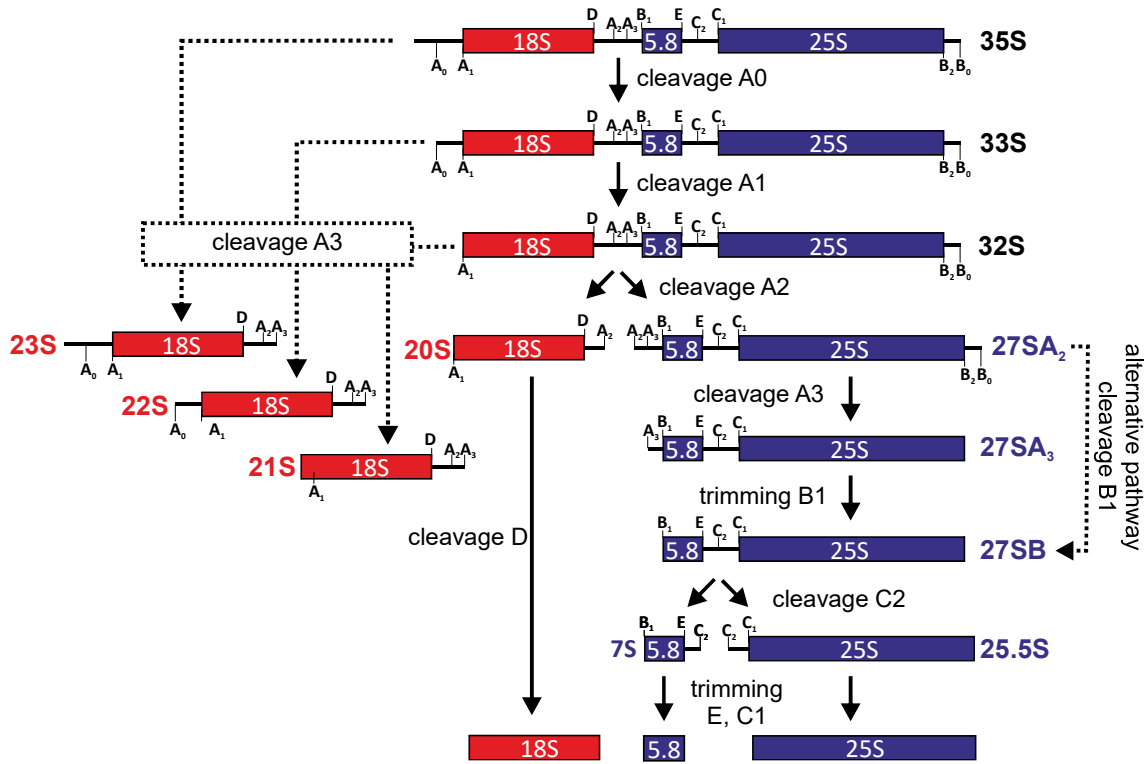

## Supplementary Figure S2

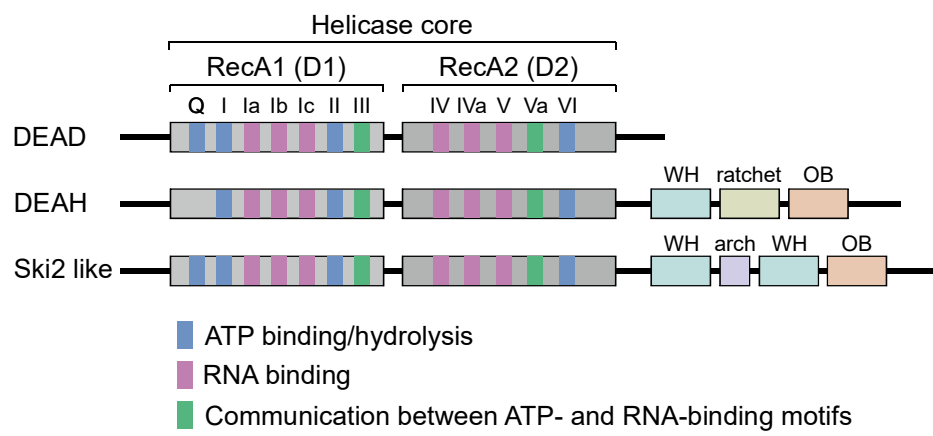

Supplement: KRNB_A_2079890_SM4051.pdf [file KRNB_A_2079890_SM4051.pdf]
